# Supplementary material
Source: PubMed Central journal article supplement (PMC4021786)
Supplement: 113.074070_ajcn074070SupplementaryData2.pdf [file 113.074070_ajcn074070SupplementaryData2.pdf]

**Supplementary Table 1. Adjusted mean levels\* of alcohol-related metabolites by different types of alcohol beverage**

| Metabolite names         | Super_pathway | Sub_pathway                        | type of alcoholic beverage predominantly consumed | age-, sex-, BMI-, eGFR- and smoking status-adjusted means of alcohol beverage consumption* | p values for difference from non-drinkers |
|--------------------------|---------------|------------------------------------|---------------------------------------------------|--------------------------------------------------------------------------------------------|-------------------------------------------|
| 2-aminobutyrate          | Amino acid    | Butanoate metabolism               | non-drinker                                       | -0.08                                                                                      | _                                         |
| 2-aminobutyrate          | Amino acid    | Butanoate metabolism               | wine                                              | 0.01                                                                                       | 9.80E-01                                  |
| 2-aminobutyrate          | Amino acid    | Butanoate metabolism               | beer                                              | 0.17                                                                                       | 2.26E-03                                  |
| 2-aminobutyrate          | Amino acid    | Butanoate metabolism               | hard_liquor                                       | 0.22                                                                                       | 3.40E-03                                  |
| 2-aminobutyrate          | Amino acid    | Butanoate metabolism               | no-preference                                     | 0.20                                                                                       | 2.63E-03                                  |
| 2-hydroxybutyrate (AHB)  | Amino acid    | Cysteine, methionine, SAM, taurir  | non-drinker                                       | -0.05                                                                                      | _                                         |
| 2-hydroxybutyrate (AHB)  | Amino acid    | Cysteine, methionine, SAM, taurir  | wine                                              | -0.16                                                                                      | 9.63E-01                                  |
| 2-hydroxybutyrate (AHB)  | Amino acid    | Cysteine, methionine, SAM, taurir  | beer                                              | 0.01                                                                                       | 8.31E-01                                  |
| 2-hydroxybutyrate (AHB)  | Amino acid    | Cysteine, methionine, SAM, taurir  | hard_liquor                                       | 0.44                                                                                       | 2.17E-07                                  |
| 2-hydroxybutyrate (AHB)  | Amino acid    | Cysteine, methionine, SAM, taurir  | no-preference                                     | 0.07                                                                                       | 4.41E-01                                  |
| 5-oxoproline             | Amino acid    | Glutathione metabolism             | non-drinker                                       | 0.09                                                                                       | _                                         |
| 5-oxoproline             | Amino acid    | Glutathione metabolism             | wine                                              | 0.49                                                                                       | 1.03E-01                                  |
| 5-oxoproline             | Amino acid    | Glutathione metabolism             | beer                                              | -0.31                                                                                      | 1.48E-07                                  |
| 5-oxoproline             | Amino acid    | Glutathione metabolism             | hard_liquor                                       | -0.45                                                                                      | 1.01E-08                                  |
| 5-oxoproline             | Amino acid    | Glutathione metabolism             | no-preference                                     | 0.00                                                                                       | 7.49E-01                                  |
| indolelactate            | Amino acid    | Tryptophan metabolism              | non-drinker                                       | -0.05                                                                                      | _                                         |
| indolelactate            | Amino acid    | Tryptophan metabolism              | wine                                              | -0.06                                                                                      | 1.00E+00                                  |
| indolelactate            | Amino acid    | Tryptophan metabolism              | beer                                              | 0.21                                                                                       | 7.02E-04                                  |
| indolelactate            | Amino acid    | Tryptophan metabolism              | hard_liquor                                       | 0.15                                                                                       | 6.04E-02                                  |
| indolelactate            | Amino acid    | Tryptophan metabolism              | no-preference                                     | -0.01                                                                                      | 9.75E-01                                  |
| alpha-hydroxyisovalerate | Amino acid    | Valine, leucine and isoleucine met | non-drinker                                       | -0.08                                                                                      | _                                         |
| alpha-hydroxyisovalerate | Amino acid    | Valine, leucine and isoleucine met | wine                                              | -0.10                                                                                      | 1.00E+00                                  |
| alpha-hydroxyisovalerate | Amino acid    | Valine, leucine and isoleucine met | beer                                              | 0.06                                                                                       | 1.66E-01                                  |
| alpha-hydroxyisovalerate | Amino acid    | Valine, leucine and isoleucine met | hard_liquor                                       | 0.71                                                                                       | 1.00E-12                                  |
| alpha-hydroxyisovalerate | Amino acid    | Valine, leucine and isoleucine met | no-preference                                     | 0.02                                                                                       | 6.00E-01                                  |
| alpha-hydroxyisocaproate | Amino acid    | Valine, leucine and isoleucine met | non-drinker                                       | -0.06                                                                                      | _                                         |
| alpha-hydroxyisocaproate | Amino acid    | Valine, leucine and isoleucine met | wine                                              | -0.15                                                                                      | 9.72E-01                                  |
| alpha-hydroxyisocaproate | Amino acid    | Valine, leucine and isoleucine met | beer                                              | 0.10                                                                                       | 7.99E-02                                  |
| alpha-hydroxyisocaproate | Amino acid    | Valine, leucine and isoleucine met | hard_liquor                                       | 0.43                                                                                       | 6.99E-08                                  |
| alpha-hydroxyisocaproate | Amino acid    | Valine, leucine and isoleucine met | no-preference                                     | 0.00                                                                                       | 9.05E-01                                  |
| 2-hydroxyisobutyrate     | Amino acid    | Valine, leucine and isoleucine met | non-drinker                                       | -0.05                                                                                      | _                                         |
| 2-hydroxyisobutyrate     | Amino acid    | Valine, leucine and isoleucine met | wine                                              | -0.44                                                                                      | 9.72E-02                                  |
| 2-hydroxyisobutyrate     | Amino acid    | Valine, leucine and isoleucine met | beer                                              | 0.20                                                                                       | 1.45E-03                                  |
| 2-hydroxyisobutyrate     | Amino acid    | Valine, leucine and isoleucine met | hard_liquor                                       | 0.11                                                                                       | 2.49E-01                                  |
| 2-hydroxyisobutyrate     | Amino acid    | Valine, leucine and isoleucine met | no-preference                                     | 0.10                                                                                       | 1.83E-01                                  |
| malate                   | Energy        | Krebs cycle                        | non-drinker                                       | -0.05                                                                                      | _                                         |
| malate                   | Energy        | Krebs cycle                        | wine                                              | 0.10                                                                                       | 8.58E-01                                  |

|                              |        |                         |               |       |          |
|------------------------------|--------|-------------------------|---------------|-------|----------|
| malate                       | Energy | Krebs cycle             | beer          | 0.13  | 4.93E-02 |
| malate                       | Energy | Krebs cycle             | hard_liquor   | 0.23  | 6.78E-03 |
| malate                       | Energy | Krebs cycle             | no-preference | 0.04  | 6.53E-01 |
| osapentaenoate (n3 DPA; 22:5 | Lipid  | Essential fatty acid    | non-drinker   | -0.07 | _        |
| osapentaenoate (n3 DPA; 22:5 | Lipid  | Essential fatty acid    | wine          | 0.01  | 9.89E-01 |
| osapentaenoate (n3 DPA; 22:5 | Lipid  | Essential fatty acid    | beer          | 0.23  | 2.17E-04 |
| osapentaenoate (n3 DPA; 22:5 | Lipid  | Essential fatty acid    | hard_liquor   | 0.33  | 5.68E-05 |
| osapentaenoate (n3 DPA; 22:5 | Lipid  | Essential fatty acid    | no-preference | -0.04 | 9.93E-01 |
| isovalerate                  | Lipid  | Fatty acid metabolism   | non-drinker   | -0.04 | _        |
| isovalerate                  | Lipid  | Fatty acid metabolism   | wine          | 0.05  | 9.74E-01 |
| isovalerate                  | Lipid  | Fatty acid metabolism   | beer          | 0.06  | 5.00E-01 |
| isovalerate                  | Lipid  | Fatty acid metabolism   | hard_liquor   | 0.21  | 1.51E-02 |
| isovalerate                  | Lipid  | Fatty acid metabolism   | no-preference | 0.04  | 7.84E-01 |
| 5-HETE                       | Lipid  | Fatty acid, monohydroxy | non-drinker   | -0.08 | _        |
| 5-HETE                       | Lipid  | Fatty acid, monohydroxy | wine          | 0.07  | 8.75E-01 |
| 5-HETE                       | Lipid  | Fatty acid, monohydroxy | beer          | 0.31  | 4.47E-07 |
| 5-HETE                       | Lipid  | Fatty acid, monohydroxy | hard_liquor   | 0.17  | 2.06E-02 |
| 5-HETE                       | Lipid  | Fatty acid, monohydroxy | no-preference | 0.10  | 8.27E-02 |
| palmitoleate (16:1n7)        | Lipid  | Long chain fatty acid   | non-drinker   | -0.11 | _        |
| palmitoleate (16:1n7)        | Lipid  | Long chain fatty acid   | wine          | 0.22  | 1.92E-01 |
| palmitoleate (16:1n7)        | Lipid  | Long chain fatty acid   | beer          | 0.37  | 1.18E-11 |
| palmitoleate (16:1n7)        | Lipid  | Long chain fatty acid   | hard_liquor   | 0.29  | 1.72E-05 |
| palmitoleate (16:1n7)        | Lipid  | Long chain fatty acid   | no-preference | 0.12  | 1.03E-02 |
| adrenate (22:4n6)            | Lipid  | Long chain fatty acid   | non-drinker   | -0.10 | _        |
| adrenate (22:4n6)            | Lipid  | Long chain fatty acid   | wine          | -0.14 | 9.99E-01 |
| adrenate (22:4n6)            | Lipid  | Long chain fatty acid   | beer          | 0.30  | 1.98E-07 |
| adrenate (22:4n6)            | Lipid  | Long chain fatty acid   | hard_liquor   | 0.42  | 3.25E-08 |
| adrenate (22:4n6)            | Lipid  | Long chain fatty acid   | no-preference | 0.04  | 3.22E-01 |
| 10-heptadecenoate (17:1n7)   | Lipid  | Long chain fatty acid   | non-drinker   | -0.08 | _        |
| 10-heptadecenoate (17:1n7)   | Lipid  | Long chain fatty acid   | wine          | 0.04  | 9.33E-01 |
| 10-heptadecenoate (17:1n7)   | Lipid  | Long chain fatty acid   | beer          | 0.28  | 2.30E-06 |
| 10-heptadecenoate (17:1n7)   | Lipid  | Long chain fatty acid   | hard_liquor   | 0.19  | 8.64E-03 |
| 10-heptadecenoate (17:1n7)   | Lipid  | Long chain fatty acid   | no-preference | 0.08  | 1.59E-01 |
| palmitate (16:0)             | Lipid  | Long chain fatty acid   | non-drinker   | -0.06 | _        |
| palmitate (16:0)             | Lipid  | Long chain fatty acid   | wine          | 0.01  | 9.93E-01 |
| palmitate (16:0)             | Lipid  | Long chain fatty acid   | beer          | 0.21  | 7.06E-04 |
| palmitate (16:0)             | Lipid  | Long chain fatty acid   | hard_liquor   | 0.19  | 2.35E-02 |
| palmitate (16:0)             | Lipid  | Long chain fatty acid   | no-preference | 0.01  | 8.92E-01 |
| eicosenoate (20:1n9 or 11)   | Lipid  | Long chain fatty acid   | non-drinker   | -0.09 | _        |
| eicosenoate (20:1n9 or 11)   | Lipid  | Long chain fatty acid   | wine          | 0.00  | 9.79E-01 |
| eicosenoate (20:1n9 or 11)   | Lipid  | Long chain fatty acid   | beer          | 0.30  | 4.89E-07 |

|                            |       |                       |               |       |          |
|----------------------------|-------|-----------------------|---------------|-------|----------|
| eicosenoate (20:1n9 or 11) | Lipid | Long chain fatty acid | hard_liquor   | 0.27  | 2.64E-04 |
| eicosenoate (20:1n9 or 11) | Lipid | Long chain fatty acid | no-preference | 0.06  | 2.36E-01 |
| dihomo-linoleate (20:2n6)  | Lipid | Long chain fatty acid | non-drinker   | -0.09 | _        |
| dihomo-linoleate (20:2n6)  | Lipid | Long chain fatty acid | wine          | 0.09  | 8.05E-01 |
| dihomo-linoleate (20:2n6)  | Lipid | Long chain fatty acid | beer          | 0.28  | 1.78E-06 |
| dihomo-linoleate (20:2n6)  | Lipid | Long chain fatty acid | hard_liquor   | 0.31  | 4.35E-05 |
| dihomo-linoleate (20:2n6)  | Lipid | Long chain fatty acid | no-preference | 0.04  | 3.93E-01 |
| oleate (18:1n9)            | Lipid | Long chain fatty acid | non-drinker   | -0.08 | _        |
| oleate (18:1n9)            | Lipid | Long chain fatty acid | wine          | 0.02  | 9.70E-01 |
| oleate (18:1n9)            | Lipid | Long chain fatty acid | beer          | 0.28  | 2.95E-06 |
| oleate (18:1n9)            | Lipid | Long chain fatty acid | hard_liquor   | 0.16  | 2.75E-02 |
| oleate (18:1n9)            | Lipid | Long chain fatty acid | no-preference | 0.14  | 2.12E-02 |
| stearidonate (18:4n3)      | Lipid | Long chain fatty acid | non-drinker   | -0.06 | _        |
| stearidonate (18:4n3)      | Lipid | Long chain fatty acid | wine          | 0.10  | 8.46E-01 |
| stearidonate (18:4n3)      | Lipid | Long chain fatty acid | beer          | 0.20  | 1.31E-03 |
| stearidonate (18:4n3)      | Lipid | Long chain fatty acid | hard_liquor   | 0.22  | 7.36E-03 |
| stearidonate (18:4n3)      | Lipid | Long chain fatty acid | no-preference | 0.01  | 8.79E-01 |
| myristate (14:0)           | Lipid | Long chain fatty acid | non-drinker   | -0.04 | _        |
| myristate (14:0)           | Lipid | Long chain fatty acid | wine          | 0.06  | 9.65E-01 |
| myristate (14:0)           | Lipid | Long chain fatty acid | beer          | 0.17  | 1.12E-02 |
| myristate (14:0)           | Lipid | Long chain fatty acid | hard_liquor   | 0.15  | 1.18E-01 |
| myristate (14:0)           | Lipid | Long chain fatty acid | no-preference | -0.03 | 9.99E-01 |
| myristoleate (14:1n5)      | Lipid | Long chain fatty acid | non-drinker   | -0.06 | _        |
| myristoleate (14:1n5)      | Lipid | Long chain fatty acid | wine          | 0.17  | 5.86E-01 |
| myristoleate (14:1n5)      | Lipid | Long chain fatty acid | beer          | 0.23  | 3.26E-04 |
| myristoleate (14:1n5)      | Lipid | Long chain fatty acid | hard_liquor   | 0.13  | 1.40E-01 |
| myristoleate (14:1n5)      | Lipid | Long chain fatty acid | no-preference | 0.01  | 8.74E-01 |
| tadecanoylglycerophosphoch | Lipid | Lysolipid             | non-drinker   | 0.07  | _        |
| tadecanoylglycerophosphoch | Lipid | Lysolipid             | wine          | 0.10  | 1.00E+00 |
| tadecanoylglycerophosphoch | Lipid | Lysolipid             | beer          | -0.16 | 6.87E-03 |
| tadecanoylglycerophosphoch | Lipid | Lysolipid             | hard_liquor   | -0.28 | 6.04E-04 |
| tadecanoylglycerophosphoch | Lipid | Lysolipid             | no-preference | -0.13 | 5.70E-02 |
| aroylglycerophosphoethanol | Lipid | Lysolipid             | non-drinker   | -0.06 | _        |
| aroylglycerophosphoethanol | Lipid | Lysolipid             | wine          | -0.16 | 9.67E-01 |
| aroylglycerophosphoethanol | Lipid | Lysolipid             | beer          | 0.26  | 3.50E-05 |
| aroylglycerophosphoethanol | Lipid | Lysolipid             | hard_liquor   | 0.13  | 1.43E-01 |
| aroylglycerophosphoethanol | Lipid | Lysolipid             | no-preference | 0.07  | 3.82E-01 |
| donoylglycerophosphoethano | Lipid | Lysolipid             | non-drinker   | -0.07 | _        |
| donoylglycerophosphoethano | Lipid | Lysolipid             | wine          | -0.09 | 1.00E+00 |
| donoylglycerophosphoethano | Lipid | Lysolipid             | beer          | 0.20  | 1.09E-03 |
| donoylglycerophosphoethano | Lipid | Lysolipid             | hard_liquor   | 0.25  | 2.70E-03 |

|                                 |         |                   |               |       |          |
|---------------------------------|---------|-------------------|---------------|-------|----------|
| donoylglycerophosphoethano      | Lipid   | Lysolipid         | no-preference | 0.06  | 4.06E-01 |
| lmitoleoylglycerophosphochol    | Lipid   | Lysolipid         | non-drinker   | -0.04 |          |
| lmitoleoylglycerophosphochol    | Lipid   | Lysolipid         | wine          | -0.06 | 1.00E+00 |
| lmitoleoylglycerophosphochol    | Lipid   | Lysolipid         | beer          | 0.25  | 2.45E-04 |
| lmitoleoylglycerophosphochol    | Lipid   | Lysolipid         | hard_liquor   | -0.06 | 9.99E-01 |
| lmitoleoylglycerophosphochol    | Lipid   | Lysolipid         | no-preference | 0.04  | 7.86E-01 |
| 5-HEPE                          | Lipid   | Metabolite of EPA | non-drinker   | -0.07 |          |
| 5-HEPE                          | Lipid   | Metabolite of EPA | wine          | -0.08 | 1.00E+00 |
| 5-HEPE                          | Lipid   | Metabolite of EPA | beer          | 0.22  | 4.89E-04 |
| 5-HEPE                          | Lipid   | Metabolite of EPA | hard_liquor   | 0.30  | 2.74E-04 |
| 5-HEPE                          | Lipid   | Metabolite of EPA | no-preference | 0.01  | 8.04E-01 |
| rosten-3beta,17beta-diol disulf | Lipid   | Sterol/Steroid    | non-drinker   | -0.14 |          |
| rosten-3beta,17beta-diol disulf | Lipid   | Sterol/Steroid    | wine          | -0.21 | 9.86E-01 |
| rosten-3beta,17beta-diol disulf | Lipid   | Sterol/Steroid    | beer          | 0.31  | 2.15E-10 |
| rosten-3beta,17beta-diol disulf | Lipid   | Sterol/Steroid    | hard_liquor   | 0.69  | 1.00E-12 |
| rosten-3beta,17beta-diol disulf | Lipid   | Sterol/Steroid    | no-preference | 0.17  | 1.46E-04 |
| androstan-3beta,17beta-diol d   | Lipid   | Sterol/Steroid    | non-drinker   | -0.13 |          |
| androstan-3beta,17beta-diol d   | Lipid   | Sterol/Steroid    | wine          | -0.09 | 9.99E-01 |
| androstan-3beta,17beta-diol d   | Lipid   | Sterol/Steroid    | beer          | 0.29  | 3.14E-10 |
| androstan-3beta,17beta-diol d   | Lipid   | Sterol/Steroid    | hard_liquor   | 0.57  | 1.00E-12 |
| androstan-3beta,17beta-diol d   | Lipid   | Sterol/Steroid    | no-preference | 0.17  | 1.62E-04 |
| leucylleucine                   | Peptide | Dipeptide         | non-drinker   | -0.04 |          |
| leucylleucine                   | Peptide | Dipeptide         | wine          | -0.06 | 1.00E+00 |
| leucylleucine                   | Peptide | Dipeptide         | beer          | 0.13  | 8.00E-02 |
| leucylleucine                   | Peptide | Dipeptide         | hard_liquor   | 0.07  | 6.34E-01 |
| leucylleucine                   | Peptide | Dipeptide         | no-preference | 0.12  | 1.74E-01 |
| gamma-glutamylleucine           | Peptide | gamma-glutamyl    | non-drinker   | 0.10  |          |
| gamma-glutamylleucine           | Peptide | gamma-glutamyl    | wine          | -0.08 | 7.64E-01 |
| gamma-glutamylleucine           | Peptide | gamma-glutamyl    | beer          | -0.35 | 2.54E-09 |
| gamma-glutamylleucine           | Peptide | gamma-glutamyl    | hard_liquor   | -0.37 | 6.98E-07 |
| gamma-glutamylleucine           | Peptide | gamma-glutamyl    | no-preference | -0.04 | 2.44E-01 |
| gamma-glutamylvaline            | Peptide | gamma-glutamyl    | non-drinker   | 0.10  |          |
| gamma-glutamylvaline            | Peptide | gamma-glutamyl    | wine          | -0.09 | 7.52E-01 |
| gamma-glutamylvaline            | Peptide | gamma-glutamyl    | beer          | -0.34 | 8.79E-09 |
| gamma-glutamylvaline            | Peptide | gamma-glutamyl    | hard_liquor   | -0.36 | 1.08E-06 |
| gamma-glutamylvaline            | Peptide | gamma-glutamyl    | no-preference | -0.05 | 2.50E-01 |
| gamma-glutamylglutamate         | Peptide | gamma-glutamyl    | non-drinker   | 0.09  |          |
| gamma-glutamylglutamate         | Peptide | gamma-glutamyl    | wine          | -0.15 | 5.52E-01 |
| gamma-glutamylglutamate         | Peptide | gamma-glutamyl    | beer          | -0.29 | 4.99E-07 |
| gamma-glutamylglutamate         | Peptide | gamma-glutamyl    | hard_liquor   | -0.35 | 3.33E-06 |
| gamma-glutamylglutamate         | Peptide | gamma-glutamyl    | no-preference | -0.04 | 3.67E-01 |

|                             |             |                      |               |       |   |          |
|-----------------------------|-------------|----------------------|---------------|-------|---|----------|
| gamma-glutamylisoleucine*   | Peptide     | gamma-glutamyl       | non-drinker   | 0.10  | _ |          |
| gamma-glutamylisoleucine*   | Peptide     | gamma-glutamyl       | wine          | -0.11 |   | 6.74E-01 |
| gamma-glutamylisoleucine*   | Peptide     | gamma-glutamyl       | beer          | -0.38 |   | 3.88E-10 |
| gamma-glutamylisoleucine*   | Peptide     | gamma-glutamyl       | hard_liquor   | -0.30 |   | 4.92E-05 |
| gamma-glutamylisoleucine*   | Peptide     | gamma-glutamyl       | no-preference | 0.00  |   | 6.34E-01 |
| gamma-glutamylphenylalanine | Peptide     | gamma-glutamyl       | non-drinker   | 0.08  | _ |          |
| gamma-glutamylphenylalanine | Peptide     | gamma-glutamyl       | wine          | -0.05 |   | 9.20E-01 |
| gamma-glutamylphenylalanine | Peptide     | gamma-glutamyl       | beer          | -0.25 |   | 2.89E-05 |
| gamma-glutamylphenylalanine | Peptide     | gamma-glutamyl       | hard_liquor   | -0.36 |   | 5.23E-06 |
| gamma-glutamylphenylalanine | Peptide     | gamma-glutamyl       | no-preference | -0.02 |   | 5.69E-01 |
| gamma-glutamylalanine       | Peptide     | gamma-glutamyl       | non-drinker   | 0.08  | _ |          |
| gamma-glutamylalanine       | Peptide     | gamma-glutamyl       | wine          | -0.09 |   | 8.01E-01 |
| gamma-glutamylalanine       | Peptide     | gamma-glutamyl       | beer          | -0.25 |   | 2.19E-05 |
| gamma-glutamylalanine       | Peptide     | gamma-glutamyl       | hard_liquor   | -0.27 |   | 4.07E-04 |
| gamma-glutamylalanine       | Peptide     | gamma-glutamyl       | no-preference | -0.05 |   | 3.30E-01 |
| gamma-glutamyltyrosine      | Peptide     | gamma-glutamyl       | non-drinker   | 0.06  | _ |          |
| gamma-glutamyltyrosine      | Peptide     | gamma-glutamyl       | wine          | -0.02 |   | 9.90E-01 |
| gamma-glutamyltyrosine      | Peptide     | gamma-glutamyl       | beer          | -0.21 |   | 8.42E-04 |
| gamma-glutamyltyrosine      | Peptide     | gamma-glutamyl       | hard_liquor   | -0.21 |   | 1.16E-02 |
| gamma-glutamyltyrosine      | Peptide     | gamma-glutamyl       | no-preference | 0.01  |   | 9.48E-01 |
| piperine                    | Xenobiotics | Food component/Plant | non-drinker   | -0.09 | _ |          |
| piperine                    | Xenobiotics | Food component/Plant | wine          | 0.04  |   | 9.26E-01 |
| piperine                    | Xenobiotics | Food component/Plant | beer          | 0.20  |   | 3.29E-04 |
| piperine                    | Xenobiotics | Food component/Plant | hard_liquor   | 0.22  |   | 2.15E-03 |
| piperine                    | Xenobiotics | Food component/Plant | no-preference | 0.22  |   | 5.05E-04 |

\*Number of glasses of wine per week, or number of bottles/cans of beer per week; or number of drinks of hard liquor per week.
